# Supplementary material for: Seed-to-plant-tracking: automated phenotyping of seeds and corresponding plants of Arabidopsis
Source: Front Plant Sci. 2025 Apr 28;16:1539424. doi: 10.3389/fpls.2025.1539424 (PMC12066762; doi:10.3389/fpls.2025.1539424)
Supplement: Supplementary Table 1 — Data of seed mass vs volume and projected seed area, respectively, shown in Figure 6 . [file Table1.xlsx]

## Sheet: Repeatability measurements
Seed.No	volume_new [mm3]	volume_old [mm3]	weight [mg]
seed 1	0.0247	0.0239676	0.0254
seed 1	0.02413	0.0240878	0.0256
seed 1	0.02371	0.0248574	0.0254
seed 1	0.02382	0.0234111	0.0254
seed 1	0.02389	0.0234467	0.0255
seed 1	0.02419	0.0249017	0.0254
seed 1	0.0245	0.0235491	0.0254
seed 1	0.0248	0.0237785	0.0255
seed 1	0.02361	0.0227561	0.0254
seed 1	0.02472	0.0243337	0.0251
seed 1	0.02432	0.0242731	0.0254
seed 1	0.02475	0.0245097	0.0254
seed 1	0.02436	0.0246532	0.0254
seed 1	0.02472	0.0228348	0.0254
seed 1	0.02457	0.0246767	0.0255
seed 1	0.02471	0.0241046	0.0255
seed 1	0.02408	0.0235547	0.0254
seed 1	0.02416	0.0223453	0.0256
seed 1	0.02466	0.0230591	0.0254
seed 1	0.02416	0.0241449	0.0255
seed 1	0.02443	0.0228808	0.0255
seed 1	0.02483	0.0251244	0.0255
seed 1	0.02401	0.0236937	0.0256
seed 1	0.02427	0.024627	0.0254
seed 1	0.02291	0.0246225	0.0255
seed 1	0.02438	0.0238583	0.0255
seed 1	0.02463	0.0243428	0.0255
seed 1	0.02403	0.0242672	0.0254
seed 1	0.02446	0.0243373	0.0254
seed 1	0.02479	0.0231248	0.0256
seed 1	0.02473	0.0247122	0.0255
seed 1	0.02437	0.0233722	0.0255
seed 1	0.02464	0.0243997	0.0255
seed 1	0.02447	0.0239826	0.0255
seed 1	0.02434	0.0245466	0.0256
seed 1	0.0244	0.0238598	0.0256
seed 1	0.02481	0.0234559	0.0256
seed 1	0.02404	0.0230479	0.0254
seed 1	0.02395	0.0242817	0.0255
seed 1	0.02451	0.0250599	0.0255
seed 1	0.02457	0.0240393	0.0255
seed 1	0.02468	0.0237119	0.0256
seed 1	0.02444	0.0251381	0.0256
seed 1	0.02496	0.0247442	0.0255
seed 1	0.02456	0.0243226	0.0256
seed 1	0.02486	0.0238175	0.0256
seed 1	0.02441	0.0247292	0.0256
seed 1	0.02447	0.0250046	0.0254
seed 1	0.02477	0.0242796	0.0256
seed 1	0.02401	0.0248882	0.0256
seed 1	0.02405	0.0238069	0.0257
seed 1	0.02428	0.0246601	0.0254
seed 1	0.02435	0.0249971	0.0256
seed 1	0.02422	0.0238613	0.0255
seed 1	0.02495	0.0246468	0.0257
seed 1	0.02487	0.0238192	0.0255
seed 1	0.02452	0.0241293	0.0256
seed 1	0.02319	0.0242259	0.0256
seed 1	0.02448	0.0233346	0.0254
seed 1	0.02461	0.0249013	0.0255
seed 1	0.02413	0.023718	0.0256
seed 1	0.02475	0.0246452	0.0256
seed 1	0.02471	0.0242425	0.0257
seed 1	0.02441	0.0242624	0.0255
seed 1	0.02441	0.0246634	0.0256
seed 1	0.02427	0.0249802	0.0256
seed 1	0.02457	0.0241823	0.0257
seed 1	0.02447	0.0244516	0.0256
seed 1	0.02417	0.0243765	0.0255
seed 1	0.02409	0.0239652	0.0255
seed 1	0.02432	0.0236774	0.0255
seed 1	0.02427	0.0245872	0.0255
seed 1	0.02493	0.0252719	0.0256
seed 1	0.02437	0.0248204	0.0257
seed 1	0.02451	0.0242859	0.0256
seed 1	0.0245	0.0244809	0.0255
seed 1	0.02405	0.0249712	0.0255
seed 1	0.02372	0.0250097	0.0255
seed 1	0.02393	0.0240266	0.0255
seed 1	0.02412	0.0237009	0.0256
seed 1	0.0244	0.0231469	0.0256
seed 1	0.02432	0.0250879	0.0256
seed 1	0.02474	0.0238535	0.0255
seed 1	0.0243	0.0238934	0.0255
seed 1	0.02416	0.0251114	0.0256
seed 1	0.02456	0.0239583	0.0255
seed 1	0.02464	0.0253273	0.0255
seed 1	0.02351	0.024157	0.0256
seed 1	0.02473	0.024797	0.0255
seed 1	0.02496	0.0245542	0.0256
seed 1	0.02502	0.0232257	0.0256
seed 1	0.02458	0.0254932	0.0255
seed 1	0.02478	0.0244243	0.0256
seed 1	0.02383	0.0244309	0.0254
seed 1	0.02269	0.0237512	0.0255
seed 1	0.0246	0.0245086	0.0255
seed 1	0.02472	0.0243819	0.0255
seed 1	0.02417	0.0239944	0.0256
seed 1	0.02417	0.0240465	0.0254
seed 1	0.02408	0.0246836	0.0255
seed 2	0.02152	0.0204166	0.0224
seed 2	0.02104	0.0206652	0.0223
seed 2	0.02135	0.0199694	0.0224
seed 2	0.02123	0.0217197	0.0223
seed 2	0.02003	0.0200884	0.0224
seed 2	0.02117	0.0205312	0.0224
seed 2	0.02108	0.0212522	0.0225
seed 2	0.02119	0.0206541	0.0226
seed 2	0.02134	0.02069	0.0224
seed 2	0.02081	0.0206991	0.0223
seed 2	0.0214	0.0203736	0.0223
seed 2	0.02188	0.0206714	0.0225
seed 2	0.02056	0.0200024	0.0223
seed 2	0.02147	0.0207691	0.0224
seed 2	0.02119	0.0204679	0.0224
seed 2	0.02096	0.0215253	0.0224
seed 2	0.02072	0.0215704	0.0224
seed 2	0.02117	0.0210633	0.0225
seed 2	0.02132	0.020889	0.0224
seed 2	0.02128	0.0213678	0.0224
seed 2	0.02163	0.0207884	0.0225
seed 2	0.02108	0.0213583	0.0226
seed 2	0.02115	0.0197515	0.0224
seed 2	0.02127	0.0206081	0.0226
seed 2	0.02163	0.0209461	0.0224
seed 2	0.02173	0.0211642	0.0225
seed 2	0.02133	0.0217065	0.0224
seed 2	0.02066	0.0201753	0.0224
seed 2	0.02113	0.0206893	0.0224
seed 2	0.02119	0.0214104	0.0223
seed 2	0.02173	0.0204621	0.0225
seed 2	0.02128	0.0214632	0.0225
seed 2	0.0207	0.0211145	0.0224
seed 2	0.02154	0.0210754	0.0224
seed 2	0.02073	0.0213008	0.0224
seed 2	0.02117	0.021295	0.0223
seed 2	0.02054	0.0199773	0.0224
seed 2	0.02146	0.0206308	0.0227
seed 2	0.02104	0.0214424	0.0224
seed 2	0.02112	0.020887	0.0226
seed 2	0.02136	0.0215129	0.0223
seed 2	0.02121	0.0212561	0.0224
seed 2	0.02123	0.021441	0.0223
seed 2	0.02062	0.0213498	0.0225
seed 2	0.02137	0.0215726	0.0226
seed 2	0.02127	0.0211841	0.0224
seed 2	0.02087	0.0220342	0.0224
seed 2	0.02085	0.0204878	0.0224
seed 2	0.02073	0.0215311	0.0226
seed 2	0.02084	0.0214006	0.0224
seed 2	0.02059	0.0211102	0.0225
seed 2	0.02091	0.0210991	0.0224
seed 2	0.02059	0.0202765	0.0226
seed 2	0.02088	0.0209892	0.0223
seed 2	0.02086	0.020586	0.0224
seed 2	0.02139	0.0215576	0.0225
seed 2	0.021	0.0209913	0.0224
seed 2	0.02071	0.0216736	0.0225
seed 2	0.02101	0.0208825	0.0225
seed 2	0.02148	0.0209677	0.0223
seed 2	0.02099	0.0211583	0.0226
seed 2	0.02164	0.0207367	0.0225
seed 2	0.02131	0.0220805	0.0226
seed 2	0.02161	0.0202397	0.0226
seed 2	0.02114	0.0212651	0.0226
seed 2	0.02121	0.020899	0.0226
seed 2	0.02173	0.0212636	0.0225
seed 2	0.02122	0.0205898	0.0226
seed 2	0.0214	0.021553	0.0224
seed 2	0.02084	0.0215658	0.0227
seed 2	0.02094	0.0216029	0.0227
seed 2	0.0206	0.0215476	0.0223
seed 2	0.02103	0.0202691	0.0225
seed 2	0.02105	0.0207266	0.0224
seed 2	0.02106	0.0221303	0.0225
seed 2	0.02117	0.0215585	0.0226
seed 2	0.02107	0.0210662	0.0226
seed 2	0.0213	0.0218366	0.0223
seed 2	0.02105	0.0213433	0.0226
seed 2	0.02149	0.0207389	0.0225
seed 2	0.02103	0.0204739	0.0225
seed 2	0.02139	0.0209486	0.0226
seed 2	0.02103	0.0201014	0.0225
seed 2	0.02157	0.0208031	0.0224
seed 2	0.02135	0.0212495	0.0225
seed 2	0.02101	0.0214173	0.0225
seed 2	0.0206	0.0211189	0.0225
seed 2	0.02073	0.0212598	0.0225
seed 2	0.02167	0.0207247	0.0225
seed 2	0.02126	0.0213872	0.0226
seed 2	0.02086	0.0209693	0.0225
seed 2	0.02123	0.0209513	0.0225
seed 2	0.02144	0.0199186	0.0224
seed 2	0.02088	0.0209951	0.0225
seed 2	0.02112	0.0214115	0.0226
seed 2	0.021	0.0210477	0.0225
seed 2	0.021	0.0209353	0.0224
seed 2	0.02119	0.0212142	0.0225
seed 2	0.02149	0.0208211	0.0225
seed 2	0.02068	0.0204591	0.0224
seed 3	0.01901	0.0187356	0.021
seed 3	0.02016	0.0197402	0.0209
seed 3	0.0195	0.0186827	0.0211
seed 3	0.01927	0.0191934	0.021
seed 3	0.01933	0.0186726	0.0209
seed 3	0.01967	0.0196471	0.021
seed 3	0.01959	0.0186671	0.021
seed 3	0.01841	0.0172642	0.0211
seed 3	0.01963	0.0190344	0.021
seed 3	0.01905	0.0186585	0.0211
seed 3	0.01946	0.0186562	0.0211
seed 3	0.01964	0.0185747	0.0211
seed 3	0.01992	0.0191333	0.021
seed 3	0.01997	0.0196392	0.021
seed 3	0.01995	0.0188538	0.021
seed 3	0.01929	0.0185793	0.021
seed 3	0.01958	0.0196055	0.0211
seed 3	0.02	0.0198972	0.0212
seed 3	0.0198	0.019819	0.021
seed 3	0.01979	0.0193989	0.021
seed 3	0.0195	0.0185686	0.0209
seed 3	0.0196	0.018556	0.0209
seed 3	0.01887	0.0194597	0.0209
seed 3	0.01946	0.018903	0.0211
seed 3	0.01911	0.0187455	0.021
seed 3	0.01985	0.0195785	0.021
seed 3	0.02019	0.0189485	0.0209
seed 3	0.01903	0.0195594	0.0209
seed 3	0.01933	0.018554	0.0209
seed 3	0.01951	0.0187415	0.0211
seed 3	0.01975	0.0186954	0.021
seed 3	0.01983	0.019715	0.0211
seed 3	0.0197	0.0196953	0.021
seed 3	0.01992	0.0198382	0.0209
seed 3	0.01854	0.0160748	0.021
seed 3	0.01965	0.0187221	0.0209
seed 3	0.01983	0.0185159	0.0208
seed 3	0.02017	0.01954	0.0211
seed 3	0.0188	0.0186509	0.0211
seed 3	0.01897	0.0190396	0.021
seed 3	0.01917	0.0187963	0.0211
seed 3	0.01962	0.0186283	0.021
seed 3	0.01952	0.018635	0.0209
seed 3	0.01943	0.0198101	0.0209
seed 3	0.01966	0.018552	0.021
seed 3	0.02016	0.0198873	0.021
seed 3	0.01986	0.0189171	0.0211
seed 3	0.01964	0.0189061	0.0211
seed 3	0.01984	0.0186241	0.0211
seed 3	0.01945	0.0185292	0.021
seed 3	0.01954	0.0188036	0.0209
seed 3	0.01981	0.0194939	0.0208
seed 3	0.01965	0.0186035	0.021
seed 3	0.01929	0.0197656	0.0211
seed 3	0.01962	0.0188584	0.021
seed 3	0.01923	0.0193226	0.021
seed 3	0.01992	0.0190839	0.021
seed 3	0.01957	0.0196202	0.021
seed 3	0.01946	0.0195833	0.0209
seed 3	0.01934	0.0186153	0.021
seed 3	0.01974	0.0198502	0.0209
seed 3	0.02	0.0193436	0.0209
seed 3	0.01827	0.0198684	0.021
seed 3	0.01972	0.0187696	0.0211
seed 3	0.01966	0.0185471	0.0211
seed 3	0.01977	0.0188592	0.021
seed 3	0.01997	0.0198003	0.021
seed 3	0.01941	0.0186444	0.021
seed 3	0.01952	0.0185404	0.0209
seed 3	0.01971	0.0186749	0.0209
seed 3	0.01952	0.0185838	0.021
seed 3	0.01897	0.0185778	0.021
seed 3	0.02013	0.0195738	0.021
seed 3	0.0196	0.0188203	0.0209
seed 3	0.01952	0.0185672	0.0211
seed 3	0.0199	0.0196662	0.0211
seed 3	0.01964	0.0186105	0.0209
seed 3	0.01943	0.0186976	0.021
seed 3	0.01892	0.0197606	0.0211
seed 3	0.02008	0.0197697	0.0209
seed 3	0.01975	0.0194914	0.021
seed 3	0.01918	0.0186105	0.0211
seed 3	0.01971	0.0184866	0.0209
seed 3	0.01939	0.018606	0.021
seed 3	0.01963	0.0186371	0.0211
seed 3	0.01975	0.0185882	0.021
seed 3	0.01938	0.0196184	0.021
seed 3	0.01944	0.0187023	0.0211
seed 3	0.01994	0.0196762	0.021
seed 3	0.01991	0.0197183	0.0209
seed 3	0.01947	0.0185764	0.0211
seed 3	0.01914	0.0187671	0.021
seed 3	0.01941	0.0192912	0.021
seed 3	0.01959	0.019624	0.0211
seed 3	0.01917	0.018528	0.021
seed 3	0.0195	0.0186819	0.021
seed 3	0.01995	0.0191187	0.021
seed 3	0.01953	0.0185704	0.021
seed 3	0.01975	0.0196416	0.021
seed 3	0.02	0.0195855	0.0209
